# Supplementary material for: Hybrid molecules of protoflavones and spirooxindole derivatives with selective cytotoxicity against triple-negative breast cancer cells
Source: Royal Society of Chemistry journal article supplement (doi:10.1039/d3md00251a), 2023-01-01

## Hybrid molecules of protoflavones and indole derivatives with selective cytotoxicity against triple-negative breast cancer cells

Gábor Girst<sup>a,†</sup>, Elizabeth A. Lopes<sup>b,†</sup>, Lídia M. Gonçalves<sup>b</sup>, Margarida Espadinha<sup>b</sup>, Norbert Kúsz<sup>a</sup>, Hui-Chun Wang<sup>d</sup>, Maria M. M. Santos<sup>b,\*</sup>, Attila Hunyadi<sup>a,\*</sup>

<sup>a</sup>Institute of Pharmacognosy, Interdisciplinary Excellence Centre, University of Szeged, Faculty of Pharmacy, Eötvös str. 6, H-6720, Szeged, Hungary.

<sup>b</sup>Research Institute for Medicines, Universidade de Lisboa, Faculty of Pharmacy, Av. Prof. Gama Pinto 1649-003 Lisboa, Portugal.

<sup>c</sup>Laboratório de Microbiologia, Departamento de Ciências Biológicas, Universidade do Porto, Faculdade de Farmácia, 4050-313 Porto, Portugal.

<sup>d</sup>Graduate Institute of Natural Products, Kaohsiung Medical University, Shih-Chuan 1st Rd. 100, Kaohsiung 807, Taiwan.

† The first two authors contributed equally to this work.

\* Corresponding Authors. E-mail: [hunyadi.attila@szte.hu](mailto:hunyadi.attila@szte.hu) (A.H.) and [mariasantos@ff.ulisboa.pt](mailto:mariasantos@ff.ulisboa.pt) (M.M.M.S.)

### Table of contents

|                                                                                         |    |
|-----------------------------------------------------------------------------------------|----|
| <b>Figure S1.</b> <sup>1</sup> H-NMR spectrum of compound <b>3a</b> .....               | 2  |
| <b>Figure S2.</b> <sup>13</sup> C-NMR spectrum of compound <b>3a</b> .....              | 2  |
| <b>Figure S3.</b> <sup>1</sup> H-NMR spectrum of compound <b>3b</b> .....               | 3  |
| <b>Figure S4.</b> <sup>13</sup> C-NMR spectrum of compound <b>3b</b> .....              | 3  |
| <b>Figure S5.</b> <sup>1</sup> H-NMR spectrum of compound <b>3c</b> .....               | 4  |
| <b>Figure S6.</b> <sup>13</sup> C-NMR spectrum of compound <b>3c</b> .....              | 4  |
| <b>Figure S7.</b> <sup>1</sup> H-NMR spectrum of compound <b>7</b> .....                | 5  |
| <b>Figure S8.</b> <sup>13</sup> C-NMR spectrum of compound <b>7</b> .....               | 5  |
| <b>Figure S9.</b> <sup>1</sup> H-NMR spectrum of compound <b>8a</b> .....               | 6  |
| <b>Figure S10.</b> <sup>13</sup> C-NMR spectrum of compound <b>8a</b> .....             | 6  |
| <b>Figure S11.</b> <sup>1</sup> H-NMR spectrum of compound <b>8b</b> .....              | 7  |
| <b>Figure S12.</b> <sup>13</sup> C-NMR spectrum of compound <b>8b</b> .....             | 7  |
| <b>Figure S13.</b> <sup>1</sup> H-NMR spectrum of compound <b>8c</b> .....              | 8  |
| <b>Figure S14.</b> <sup>13</sup> C-NMR spectrum of compound <b>8c</b> .....             | 8  |
| <b>Figure S15.</b> <sup>1</sup> H-NMR spectrum of compound <b>9</b> .....               | 9  |
| <b>Figure S16.</b> <sup>13</sup> C-NMR spectrum of compound <b>9</b> .....              | 9  |
| <b>Figure S17.</b> <sup>1</sup> H-NMR spectrum of compound <b>10</b> .....              | 10 |
| <b>Figure S18.</b> <sup>13</sup> C-NMR spectrum of compound <b>10</b> .....             | 10 |
| <b>Figure S19.</b> <sup>1</sup> H-NMR spectrum of compound <b>11</b> .....              | 11 |
| <b>Figure S20.</b> <sup>13</sup> C-NMR spectrum of compound <b>11</b> .....             | 11 |
| <b>Figure S21.</b> <sup>1</sup> H-NMR spectrum of compound <b>12</b> .....              | 12 |
| <b>Figure S22.</b> <sup>13</sup> C-NMR spectrum of compound <b>12</b> .....             | 12 |
| <b>Figure S23.</b> <sup>1</sup> H-NMR spectrum of compound <b>13</b> .....              | 13 |
| <b>Figure S24.</b> <sup>13</sup> C-NMR spectrum of compound <b>13</b> .....             | 13 |
| <b>Figure S25.</b> The non-cut images of the gel bands (Figure 3. in the article) ..... | 14 |

Figure S1.  $^1\text{H-NMR}$  spectrum of compound **3a**

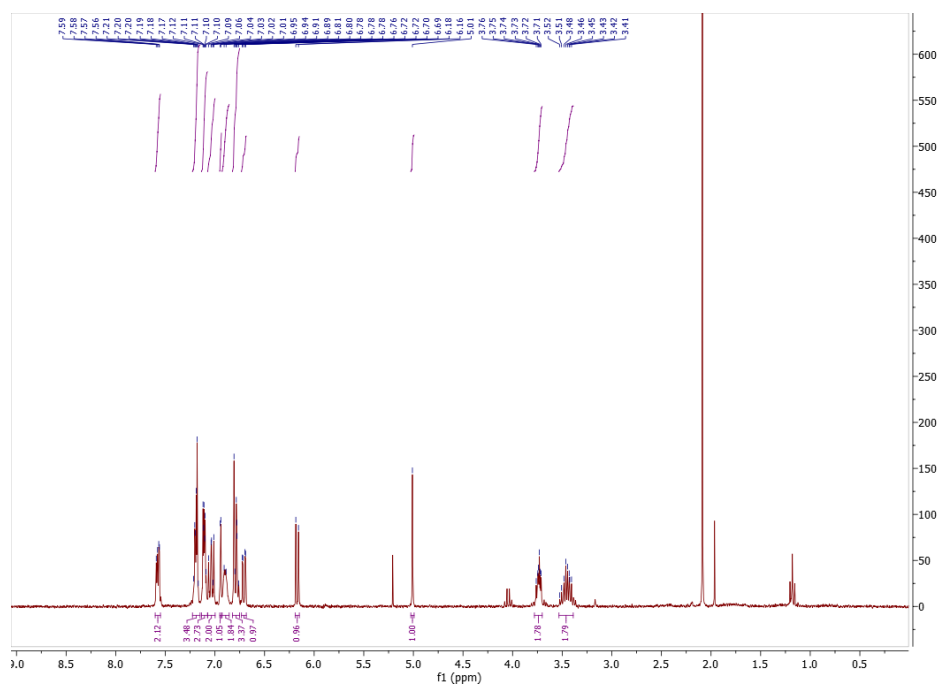

Figure S2.  $^{13}\text{C-NMR}$  spectrum of compound **3a**

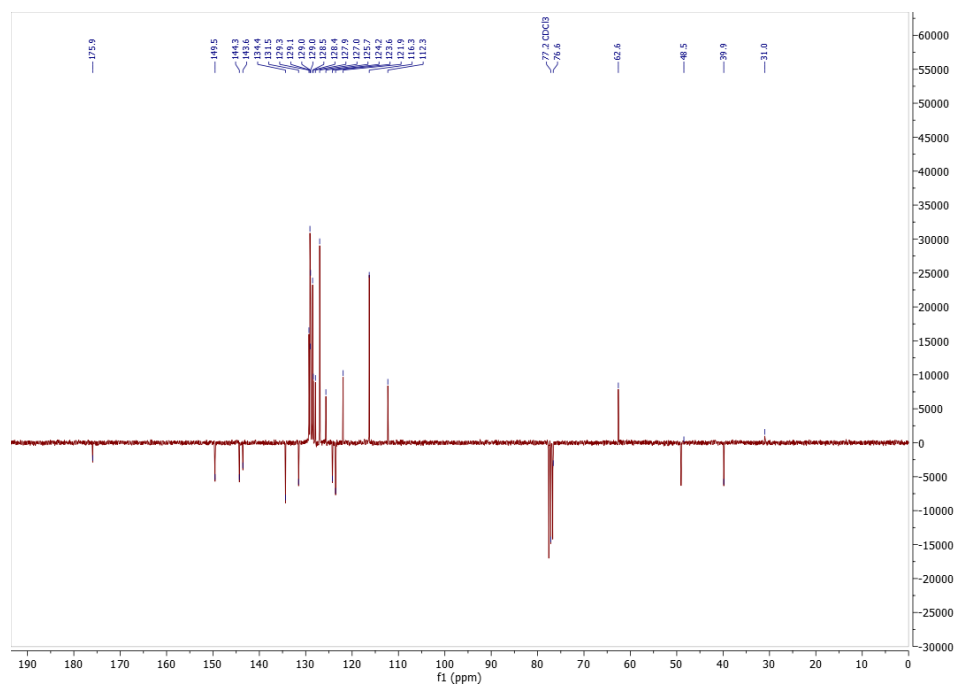

Figure S3. <sup>1</sup>H-NMR spectrum of compound 3b

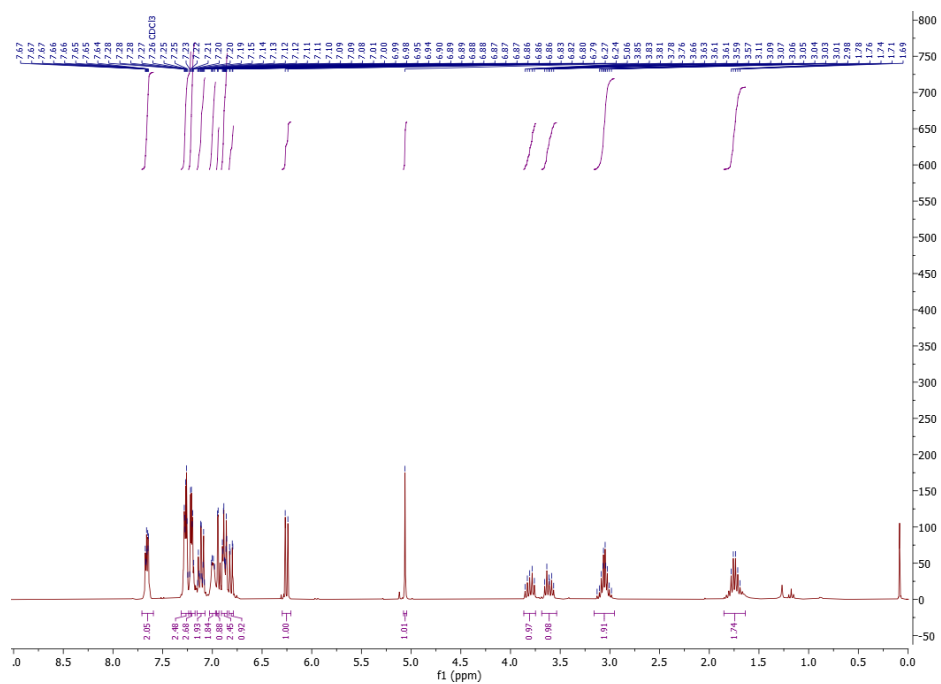

Figure S4. <sup>13</sup>C-NMR spectrum of compound 3b

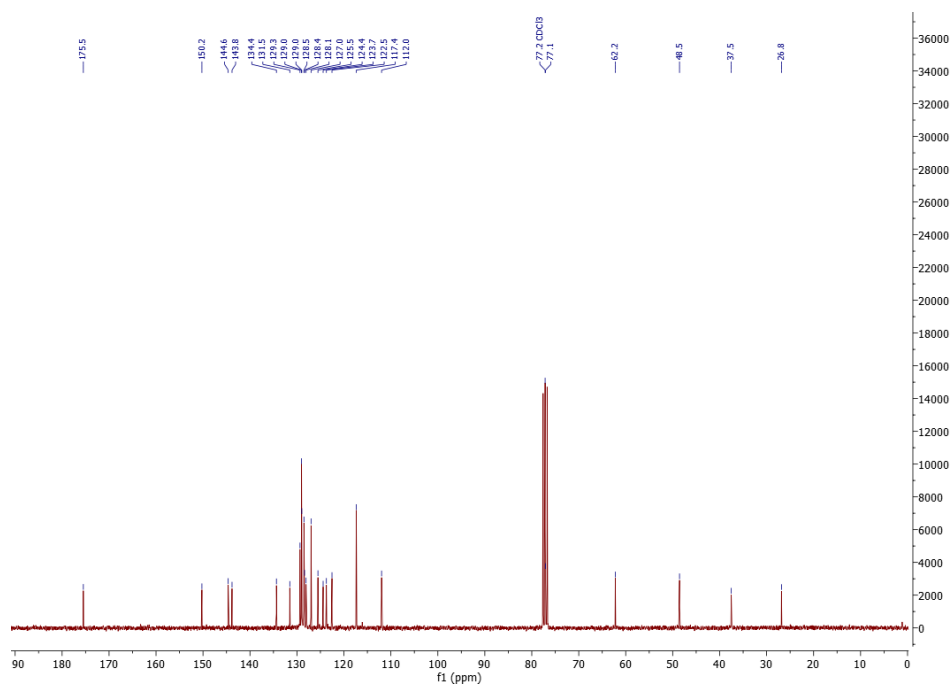



Figure S7. <sup>1</sup>H-NMR spectrum of compound 7

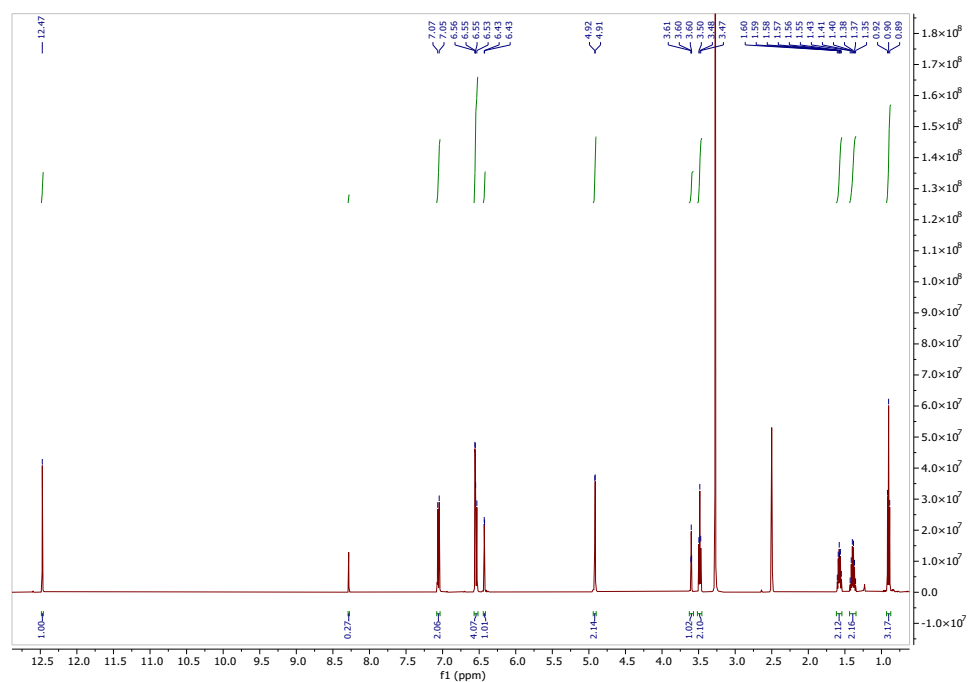

Figure S8. <sup>13</sup>C-NMR spectrum of compound 7

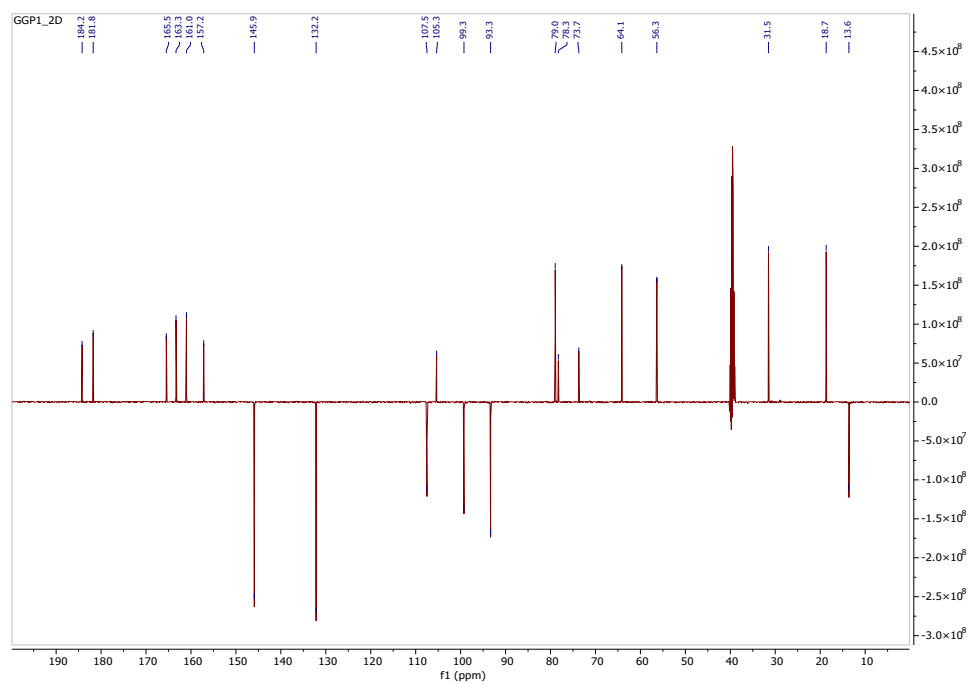

Figure S9.  $^1\text{H}$ -NMR spectrum of compound **8a**

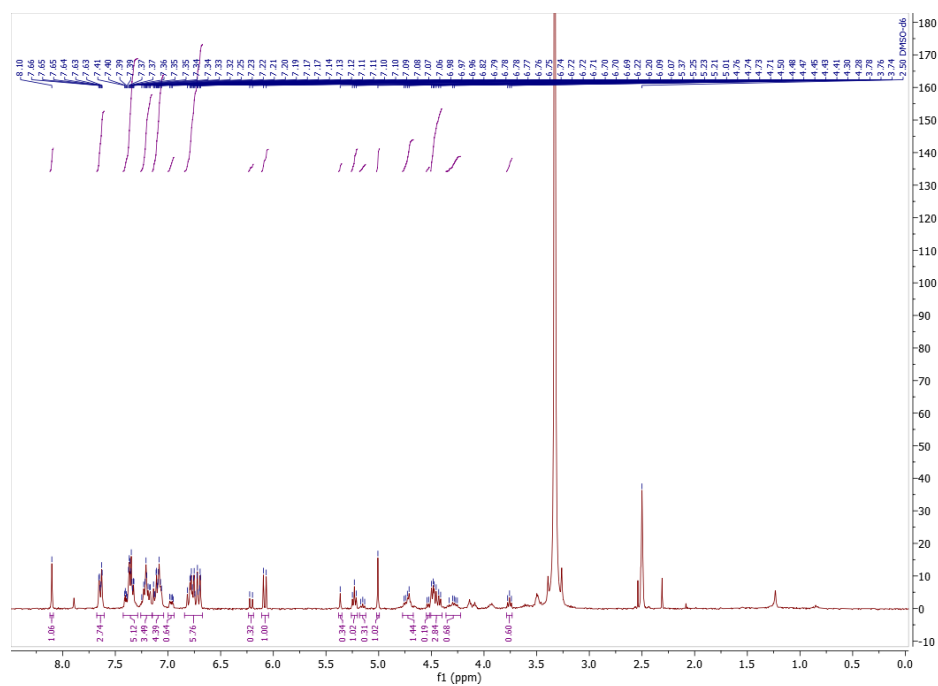



Figure S13. <sup>1</sup>H-NMR spectrum of compound 8c

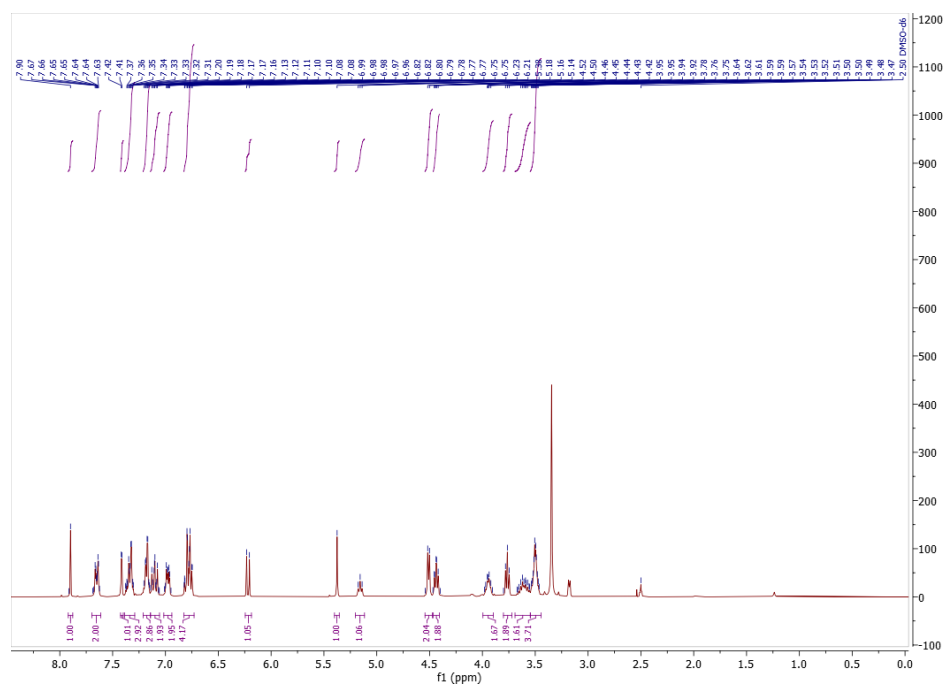

Figure S14. <sup>13</sup>C-NMR spectrum of compound 8c

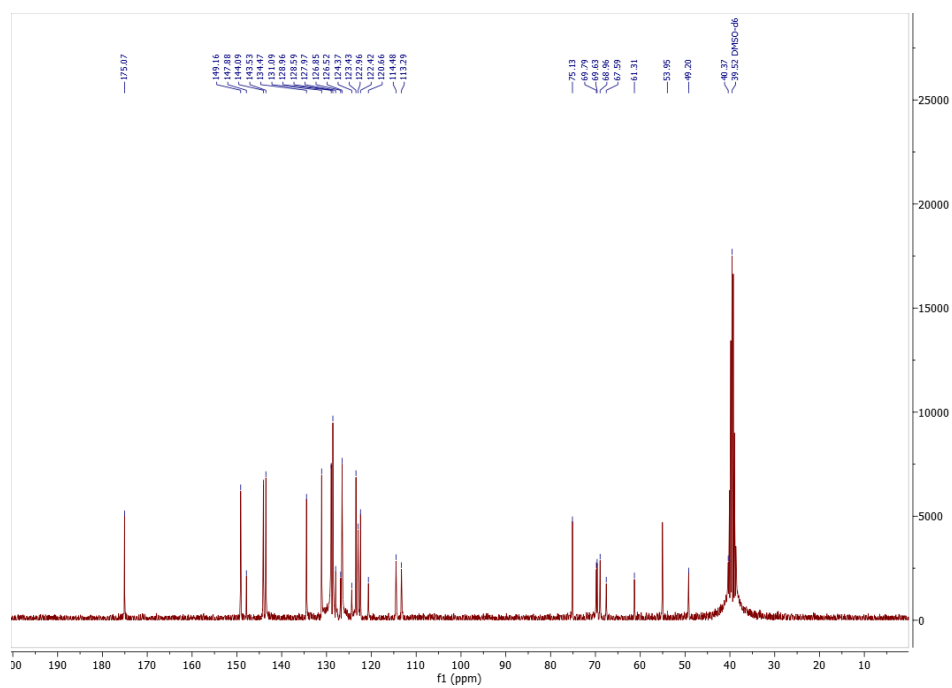



Figure S15. <sup>1</sup>H-NMR spectrum of compound 9

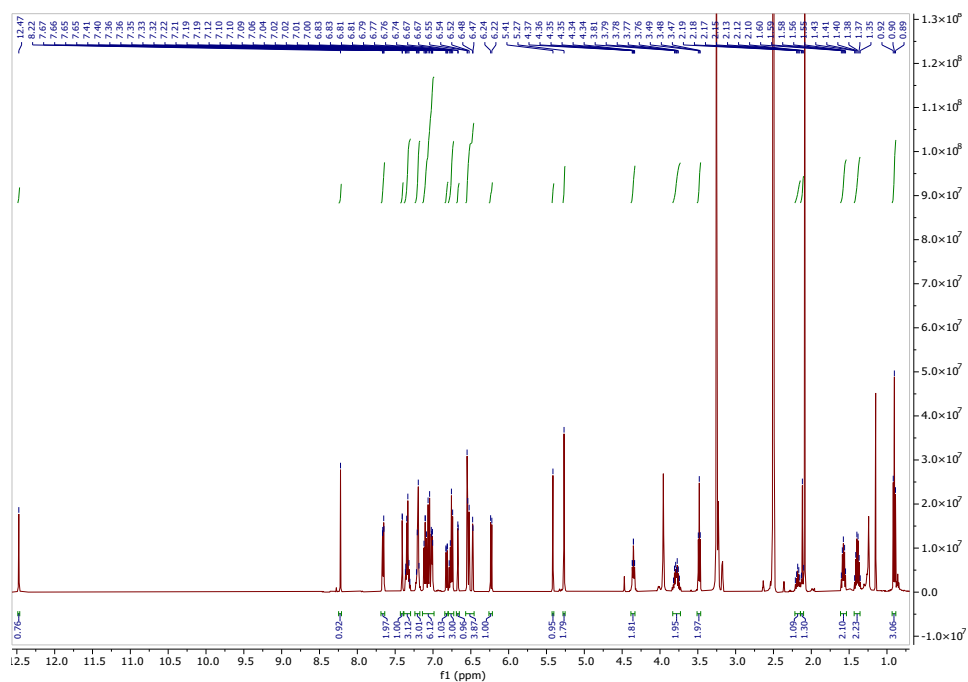

Figure S16. <sup>13</sup>C-NMR spectrum of compound 9

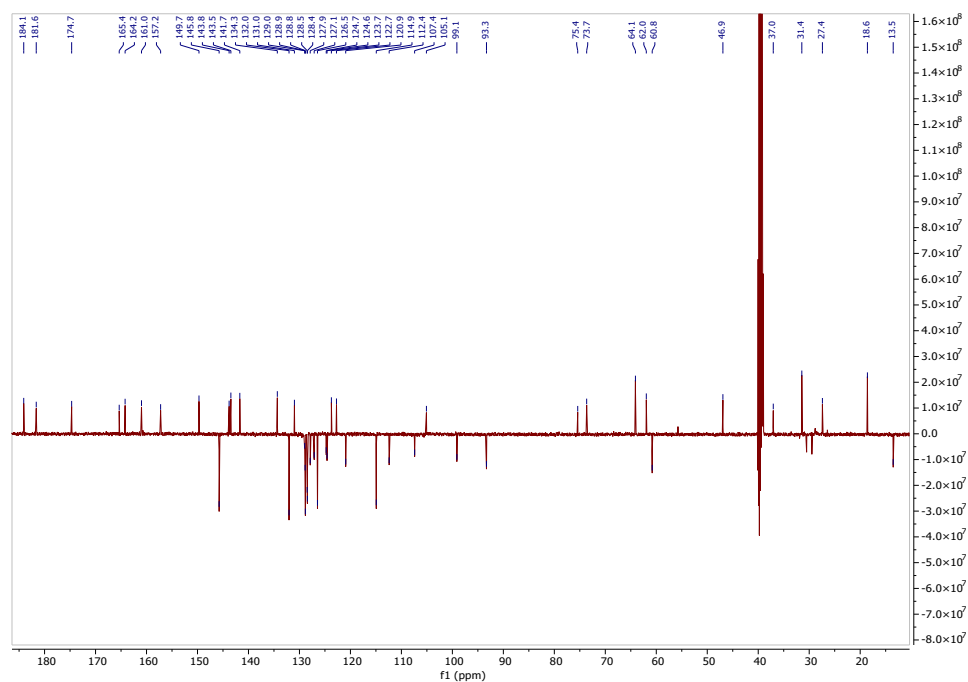

Figure S17. <sup>1</sup>H-NMR spectrum of compound 10

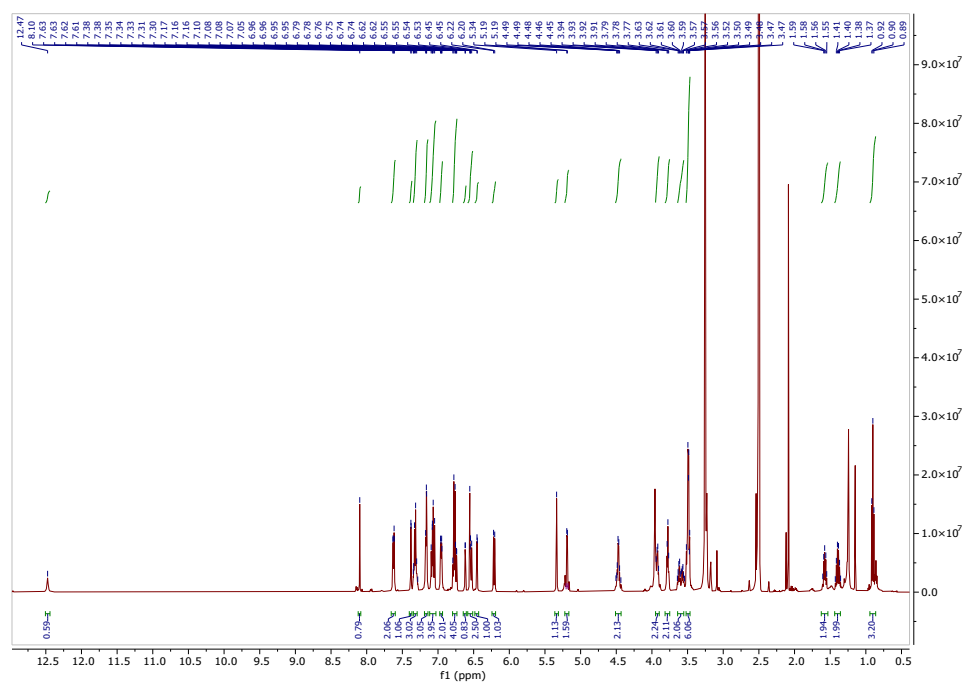

Figure S18. <sup>13</sup>C-NMR spectrum of compound 10

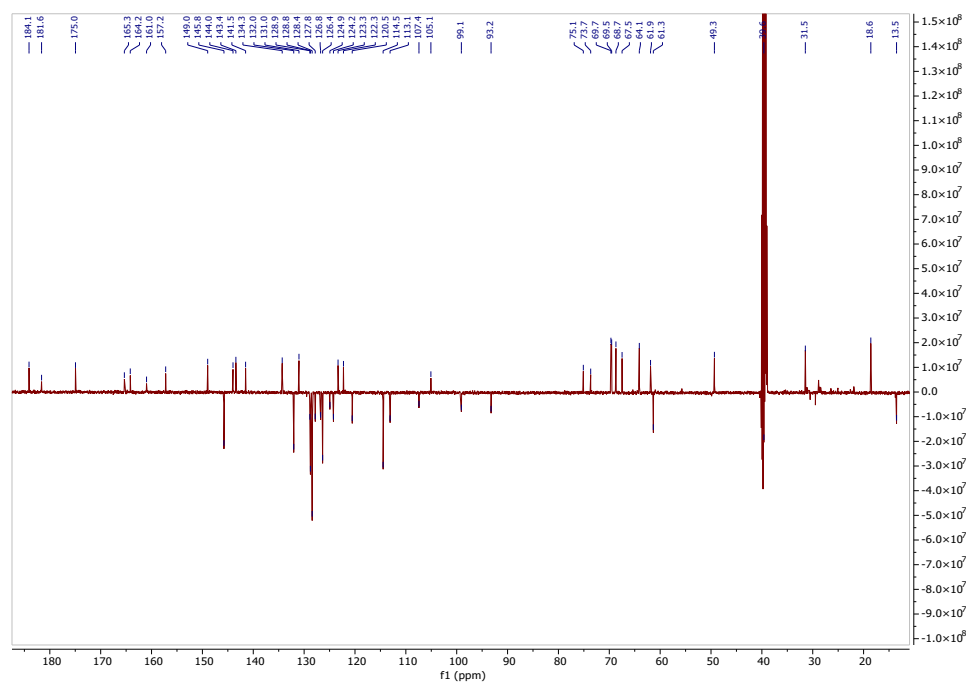



Figure S21. <sup>1</sup>H-NMR spectrum of compound 12

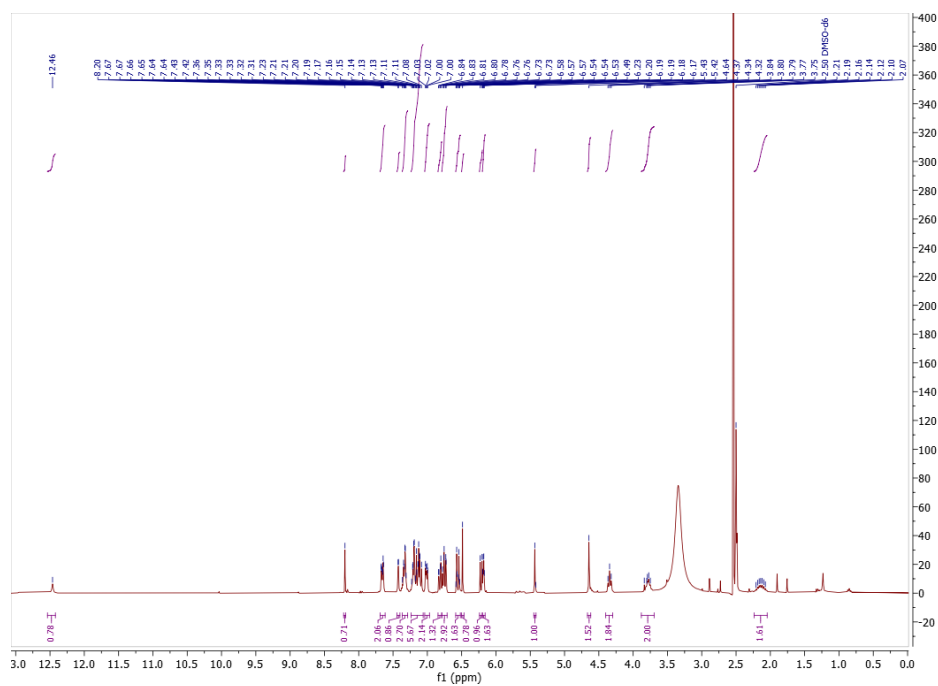

Figure S22. <sup>13</sup>C-NMR spectrum of compound 12

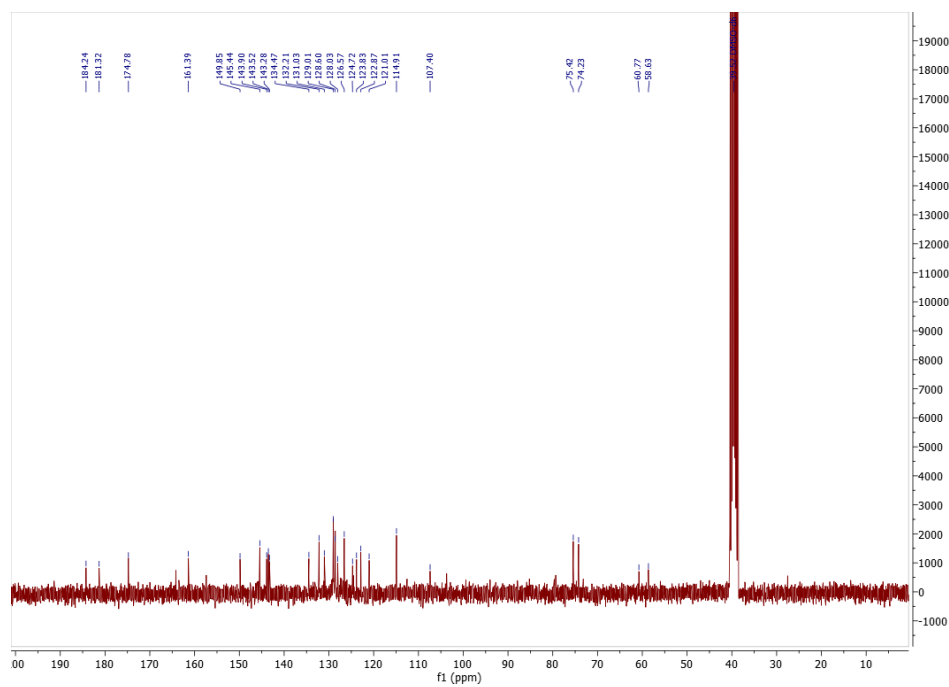

Figure S23. <sup>1</sup>H-NMR spectrum of compound 13

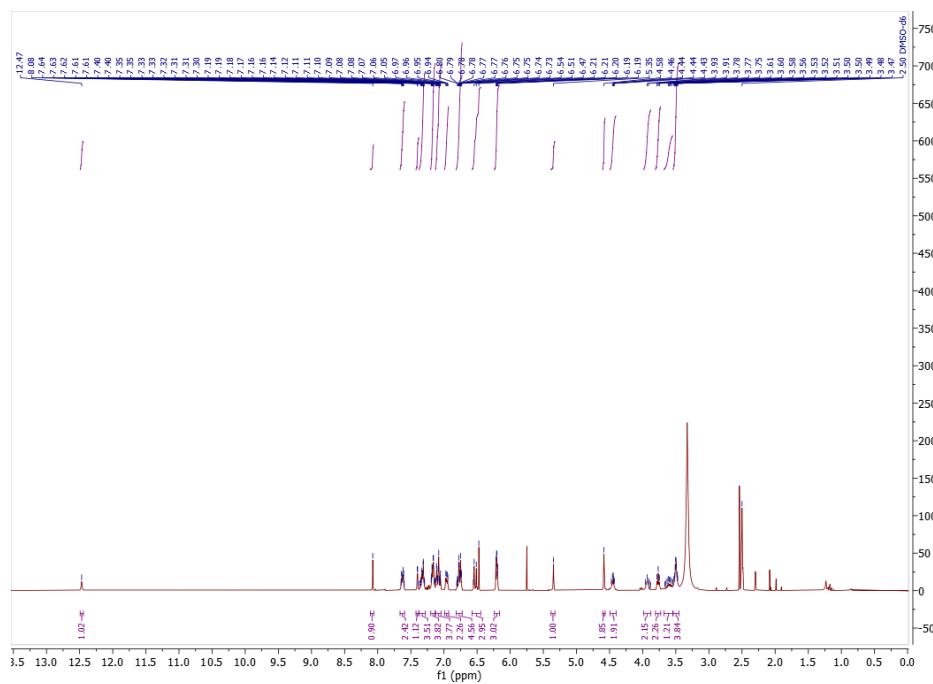

**Figure S25.** The non-cut images of the gel bands (Figure 3. in the article)

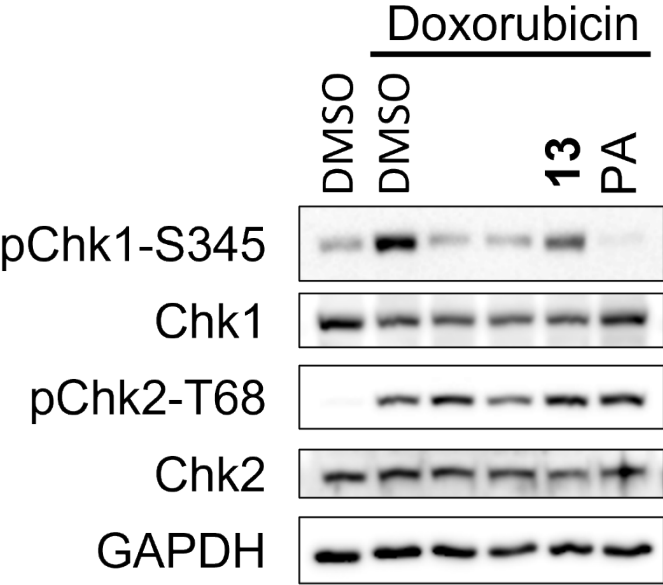

Supplement: d3md00251a1.pdf [file d3md00251a1.pdf]
